# Supplementary material for: Veterinary Chiropractic Treatment as a Measure to Prevent the Occurrence of Spondylosis in Boxers
Source: MDPI journal article supplement (doi:10.3390/vetsci8090199), 2021-09-17
Supplement: s1 [file vetsci-1277109-supplementary.pdf › vetsci-1277109-supplementary.pdf]

**Table S1.** Dataset used in the final statistical analyses. Information about the number of dogs excluded from each litter and on the spondylosis score of the parents of each litter and may be obtained from Table 1.

| Litter # | Dog # within Litter | Treatment Group | No. of Times Treated | Sex    | No. of Joints with Decreased Mobility | Spondylosis Score |
|----------|---------------------|-----------------|----------------------|--------|---------------------------------------|-------------------|
| 1        | 1                   | Treated         | 10                   | Female | 49                                    | 0                 |
|          | 2                   | Treated         | 10                   | Female | 29                                    | 0                 |
|          | 3                   | Control         | 0                    | Female | -                                     | 0                 |
|          | 4                   | Control         | 0                    | Female | -                                     | 0                 |
| 2        | 1                   | Treated         | 11                   | Female | 43                                    | 0                 |
|          | 2                   | Treated         | 11                   | Male   | 43                                    | 0                 |
|          | 3                   | Treated         | 10                   | Female | 26                                    | 0                 |
|          | 4                   | Treated         | 11                   | Female | 40                                    | 0                 |
|          | 5                   | Treated         | 10                   | Male   | 40                                    | 0                 |
|          | 6                   | Control         | 0                    | Male   | -                                     | 0                 |
|          | 7                   | Control         | 0                    | Male   | -                                     | 0                 |
|          | 8                   | Control         | 0                    | Male   | -                                     | 0                 |
|          | 9                   | Control         | 0                    | Male   | -                                     | 0                 |
| 3        | 1                   | Treated         | 11                   | Male   | 58                                    | 0                 |
|          | 2                   | Treated         | 7                    | Male   | 38                                    | 0                 |
|          | 3                   | Treated         | 11                   | Male   | 62                                    | 1                 |
|          | 4                   | Control         | 0                    | Male   | -                                     | 0                 |
|          | 5                   | Control         | 0                    | Female | -                                     | 1                 |
|          | 6                   | Control         | 0                    | Female | -                                     | 2                 |
|          | 7                   | Control         | 0                    | Female | -                                     | 1                 |
| 4        | 1                   | Treated         | 8                    | Male   | 24                                    | 0                 |
|          | 2                   | Treated         | 8                    | Female | 34                                    | 2                 |
|          | 3                   | Treated         | 7                    | Female | 22                                    | 0                 |
|          | 4                   | Control         | 0                    | Male   | -                                     | 1                 |
|          | 5                   | Control         | 0                    | Male   | -                                     | 3                 |
|          | 6                   | Control         | 0                    | Female | -                                     | 1                 |
|          | 7                   | Control         | 0                    | Female | -                                     | 0                 |
| 5        | 1                   | Treated         | 10                   | Female | 61                                    | 0                 |
|          | 2                   | Treated         | 10                   | Female | 22                                    | 0                 |
|          | 3                   | Treated         | 10                   | Male   | 51                                    | 0                 |
|          | 4                   | Control         | 0                    | Female | -                                     | 0                 |
|          | 5                   | Control         | 0                    | Female | -                                     | 0                 |
|          | 6                   | Control         | 0                    | Female | -                                     | 1                 |
| 6        | 1                   | Treated         | 8                    | Male   | 46                                    | 3                 |
|          | 2                   | Treated         | 7                    | Female | 27                                    | 3                 |
|          | 3                   | Treated         | 8                    | Male   | 11                                    | 0                 |
|          | 4                   | Control         | 0                    | Male   | -                                     | 2                 |
| 7        | 1                   | Treated         | 8                    | Male   | 40                                    | 0                 |
|          | 2                   | Treated         | 8                    | Female | 42                                    | 0                 |
|          | 3                   | Treated         | 8                    | Male   | 10                                    | 0                 |
|          | 4                   | Control         | 0                    | Male   | -                                     | 0                 |
|          | 5                   | Control         | 0                    | Female | -                                     | 3                 |
|          | 6                   | Control         | 0                    | Female | -                                     | 1                 |

| Litter # | Dog #<br>within<br>Litter | Treatment<br>Group | No. of<br>Times<br>Treated | Sex    | No. of Joints with<br>Decreased<br>Mobility | Spondylosis<br>Score |
|----------|---------------------------|--------------------|----------------------------|--------|---------------------------------------------|----------------------|
| 8        | 1                         | Treated            | 11                         | Male   | 39                                          | 0                    |
|          | 2                         | Treated            | 11                         | Male   | 39                                          | 0                    |
|          | 3                         | Treated            | 9                          | Female | 39                                          | 2                    |
|          | 4                         | Treated            | 10                         | Male   | 23                                          | 0                    |
|          | 5                         | Control            | 0                          | Male   | -                                           | 0                    |
|          | 6                         | Control            | 0                          | Male   | -                                           | 2                    |
| 9        | 1                         | Treated            | 9                          | Female | 49                                          | 1                    |
|          | 2                         | Treated            | 10                         | Male   | 49                                          | 0                    |
|          | 3                         | Control            | 0                          | Female | -                                           | 0                    |
|          | 4                         | Control            | 0                          | Male   | -                                           | 0                    |
| 10       | 1                         | Treated            | 10                         | Female | 33                                          | 2                    |
|          | 2                         | Treated            | 7                          | Male   | 25                                          | 0                    |
|          | 3                         | Control            | 0                          | Male   | -                                           | 2                    |
|          | 4                         | Control            | 0                          | Male   | -                                           | 3                    |
|          | 5                         | Control            | 0                          | Male   | -                                           | 2                    |
|          | 6                         | Control            | 0                          | Female | -                                           | 0                    |
| 11       | 1                         | Treated            | 8                          | Female | 21                                          | 0                    |
|          | 2                         | Control            | 0                          | Female | -                                           | 0                    |
| 12       | 1                         | Treated            | 9                          | Female | 45                                          | 0                    |
|          | 2                         | Control            | 0                          | Female | -                                           | 2                    |
|          | 3                         | Control            | 0                          | Female | -                                           | 0                    |
| 13       | 1                         | Treated            | 2                          | Female | 9                                           | 0                    |
|          | 2                         | Treated            | 7                          | Male   | 16                                          | 0                    |
|          | 3                         | Control            | 0                          | Female | -                                           | 0                    |
|          | 4                         | Control            | 0                          | Male   | -                                           | 1                    |
| 14       | 1                         | Treated            | 11                         | Female | 39                                          | 0                    |
|          | 2                         | Control            | 0                          | Male   | -                                           | 0                    |
| 15       | 1                         | Treated            | 11                         | Female | 48                                          | 0                    |
|          | 2                         | Treated            | 11                         | Female | 37                                          | 0                    |
|          | 3                         | Treated            | 11                         | Female | 38                                          | 0                    |
|          | 4                         | Treated            | 11                         | Male   | 21                                          | 1                    |
|          | 5                         | Control            | 0                          | Male   | -                                           | 0                    |
|          | 6                         | Control            | 0                          | Female | -                                           | 0                    |
| 16       | 1                         | Treated            | 11                         | Male   | 21                                          | 0                    |
|          | 2                         | Treated            | 11                         | Female | 29                                          | 0                    |
|          | 3                         | Treated            | 7                          | Female | 26                                          | 1                    |
|          | 4                         | Control            | 0                          | Female | -                                           | 0                    |
|          | 5                         | Control            | 0                          | Female | -                                           | 0                    |
| 17       | 1                         | Treated            | 9                          | Female | 40                                          | 1                    |
|          | 2                         | Treated            | 9                          | Female | 38                                          | 3                    |
|          | 3                         | Control            | 0                          | Female | -                                           | 3                    |
|          | 4                         | Control            | 0                          | Female | -                                           | 3                    |
|          | 5                         | Control            | 0                          | Female | -                                           | 1                    |
|          | 6                         | Control            | 0                          | Male   | -                                           | 2                    |
